# Supplementary material for: Optical Genome Mapping Reveals Genomic Alterations upon Gene Editing in hiPSCs: Implications for Neural Tissue Differentiation and Brain Organoid Research
Source: MDPI journal article supplement (doi:10.3390/cells13060507), 2024-03-14
Supplement: s1 [file s1]

## Supplementary Material

**Supplementary Table S 1.** Gene list of affected genes as revealed by optical genome mapping in hiPSCs.

| Chromosome                                                                                                                                                                                                                                                                                                                                                                                                                                                       | Symbol    | Gene name                                         | Gene Group                              |
|------------------------------------------------------------------------------------------------------------------------------------------------------------------------------------------------------------------------------------------------------------------------------------------------------------------------------------------------------------------------------------------------------------------------------------------------------------------|-----------|---------------------------------------------------|-----------------------------------------|
|                                                                                                                                                                                                                                                                                                                                                                                                                                                                  |           |                                                   |                                         |
|  <p><b>Copyright:</b> © 2024 by the authors. Licensee MDPI, Basel, Switzerland. This article is an open access article distributed under the terms and conditions of the Creative Commons Attribution (CC BY) license (<a href="https://creativecommons.org/licenses/by/4.0/">https://creativecommons.org/licenses/by/4.0/</a>).</p> <p>Chromosome 20. 20q11.21 duplication</p> | DEFB115   | Defensin beta 115                                 | Defensins                               |
|                                                                                                                                                                                                                                                                                                                                                                                                                                                                  | DEFB116   | Defensin beta 116                                 | Defensins                               |
|                                                                                                                                                                                                                                                                                                                                                                                                                                                                  | DEFB118   | Defensin beta 118                                 | Defensins                               |
|                                                                                                                                                                                                                                                                                                                                                                                                                                                                  | DEFB119   | Defensin beta 119                                 | Defensins                               |
|                                                                                                                                                                                                                                                                                                                                                                                                                                                                  | DEFB121   | Defensin beta 121                                 | Defensins                               |
|                                                                                                                                                                                                                                                                                                                                                                                                                                                                  | DEFB122   | Defensin beta 122                                 | Defensins                               |
|                                                                                                                                                                                                                                                                                                                                                                                                                                                                  | DEFB123   | Defensin beta 123                                 | Defensins                               |
|                                                                                                                                                                                                                                                                                                                                                                                                                                                                  | DEFB124   | Defensin beta 124                                 | Defensins                               |
|                                                                                                                                                                                                                                                                                                                                                                                                                                                                  | REM1      | RRAD and GEM like GTPase 1                        | RGK type GTPase family                  |
|                                                                                                                                                                                                                                                                                                                                                                                                                                                                  | LINC00028 | Long intergenic non-protein coding RNA 28         | Long intergenic non-protein coding RNAs |
|                                                                                                                                                                                                                                                                                                                                                                                                                                                                  | HM13      | Histocompatibility minor 13                       | Peptidase family A22                    |
|                                                                                                                                                                                                                                                                                                                                                                                                                                                                  | MCTS2     | Malignant T Cell-Amplified Sequence 2, Pseudogene |                                         |
|                                                                                                                                                                                                                                                                                                                                                                                                                                                                  | HM13-AS1  | HM13 antisense RNA 1                              | Antisense RNAs                          |
|                                                                                                                                                                                                                                                                                                                                                                                                                                                                  | ID1       | Inhibitor of DNA                                  | Basic helix-loop-helix                  |

|                                |          |                                             |                                                                                                |
|--------------------------------|----------|---------------------------------------------|------------------------------------------------------------------------------------------------|
|                                |          | binding 1                                   | proteins                                                                                       |
|                                | MIR3193  | MicroRNA 3193                               | MicroRNAs                                                                                      |
|                                | COX4I2   | Cytochrome c oxidase subunit 4I2            | Mitochondrial complex IV: cytochrome c oxidase subunits                                        |
|                                | BCL2L1   | BCL2 like 1                                 | Protein phosphatase 1 regulatory subunits. BCL2 family                                         |
|                                | TPX2     | TPX2 microtubule nucleation factor          |                                                                                                |
| Chromosome 6. 6p21.33 deletion | PPP1R10  | Protein phosphatase 1 regulatory subunit 10 | Protein phosphatase 1 regulatory subunits                                                      |
|                                | MRPS18B  | Mitochondrial ribosomal protein S18B        | Small subunit mitochondrial ribosomal proteins.                                                |
|                                | ATAT1    | Alpha tubulin acetyltransferase 1           | Lysine acetyltransferases                                                                      |
|                                | C6orf136 | Chromosome 6 open reading frame 136         |                                                                                                |
|                                | DHX16    | DEAH-box helicase 16                        | Spliceosomal Bact complex. Spliceosomal P complex. DEAH-box helicases. Spliceosomal C complex. |
|                                | PPP1R18  | Protein phosphatase 1 regulatory subunit 18 | Protein phosphatase 1 regulatory subunits                                                      |
|                                | NRM      | Nurim (Nuclear Envelope Membrane Protein)   |                                                                                                |
|                                | MDC1     | Mediator of DNA damage checkpoint 1         |                                                                                                |
|                                | TUBB     | Tubulin beta class I                        | Tubulins                                                                                       |
|                                | FLOT1    | Flotillin 1                                 | Flotillins                                                                                     |
|                                | IER3     | Immediate early                             |                                                                                                |

|  |           |                                             |                                                                                |
|--|-----------|---------------------------------------------|--------------------------------------------------------------------------------|
|  |           | response 3                                  |                                                                                |
|  | LINC00243 | Long intergenic non-protein coding RNA 243  | Long intergenic non-protein coding RNAs                                        |
|  | DDR1      | Discoidin domain receptor tyrosine kinase 1 | Receptor tyrosine kinases. CD molecules. MicroRNA protein coding host genes    |
|  | MIR4640   | MicroRNA 4640                               | MicroRNAs                                                                      |
|  | GTF2H4    | General transcription factor IIH subunit 4  | Nucleotide excision repair. General transcription factor IIH complex subunits. |
|  | VAR52     | Valyl-tRNA synthetase 2, mitochondrial      | Aminoacyl tRNA synthetases, Class I                                            |
|  | SFTA2     | Surfactant associated 2                     |                                                                                |
|  | MUCL3     | Mucin like 3                                |                                                                                |
|  | MUC21     | Mucin 21, cell surface associated           | Mucins                                                                         |
|  | MUC22     | Mucin 22                                    | Mucins                                                                         |
|  | HCG22     | HLA complex group 22 (gene/pseudogene)      |                                                                                |
|  | C6orf15   | Chromosome 6 open reading frame 15          |                                                                                |
|  | PSORS1C1  | Psoriasis susceptibility 1 candidate 1      |                                                                                |
|  | CDSN      | Corneodesmosin                              |                                                                                |
|  | PSORS1C2  | Psoriasis susceptibility 1 candidate 2      |                                                                                |
|  | CCHCR1    | Coiled-coil alpha-helical rod protein 1     |                                                                                |
|  | TCF19     | Transcription factor 19                     | PHD finger proteins                                                            |
|  | POU5F1    | POU class 5 homeobox 1                      | POU class homeoboxes and pseudogenes                                           |

|  |          |                                                  |                                                                                                                                          |
|--|----------|--------------------------------------------------|------------------------------------------------------------------------------------------------------------------------------------------|
|  | PSORS1C3 | Psoriasis susceptibility 1 candidate 3           | Long non-coding RNAs with non-systematic symbols                                                                                         |
|  | HCG27    | HLA complex group 27                             | Long non-coding RNAs with non-systematic symbols                                                                                         |
|  | HLA-C    | Major histocompatibility complex, class I, C     | C1-set domain containing. Histocompatibility complex                                                                                     |
|  | MICA     | MHC class I polypeptide-related sequence A       | C1-set domain containing                                                                                                                 |
|  | HCP5     | HLA Complex P5                                   | Long non-coding RNAs with non-systematic symbols                                                                                         |
|  | HCG26    | HLA complex group 26                             | Long non-coding RNAs with non-systematic symbols                                                                                         |
|  | MICB     | MHC class I polypeptide-related sequence B       | C1-set domain containing                                                                                                                 |
|  | MCCD1    | Mitochondrial coiled-coil domain 1               |                                                                                                                                          |
|  | DDX39B   | DEXD-box helicase 39B                            | Transcriptions and export complex 1 subunits. Spliceosomal E complex. Small nucleolar RNA protein coding host genes. DEAD-box helicases. |
|  | SNORD117 | Small nucleolar RNA, C/D box 117                 | Small nucleolar RNAs, C/D box                                                                                                            |
|  | ATP6V1G2 | ATPase H <sup>+</sup> transporting V1 subunit G2 | V-type ATPase subunits                                                                                                                   |
|  | NFKBIL1  | NFKB inhibitor like 1                            |                                                                                                                                          |
|  | LTA      | Lymphotoxin alpha.                               | Tumor necrosis factor                                                                                                                    |

|  |         |                                                  |                                                                                   |
|--|---------|--------------------------------------------------|-----------------------------------------------------------------------------------|
|  |         |                                                  | superfamily                                                                       |
|  | TNF     | Tumor necrosis factor                            | Tumor necrosis factor superfamily                                                 |
|  | LTB     | Lymphotoxin beta                                 | Tumor necrosis factor superfamily                                                 |
|  | LST1    | Leukocyte specific transcript 1                  |                                                                                   |
|  | NCR3    | Natural cytotoxicity triggering receptor 3       | V-S domain containing CD molecules                                                |
|  | AIF1    | Allograft inflammatory factor 1                  | EF-hand domain containing                                                         |
|  | PRRC2A  | Proline rich coiled-coil 2A                      | Small nucleolar RNA protein coding host genes. MicroRNA protein coding host genes |
|  | SNORA38 | Small nucleolar RNA, H/ACA box 38                | Small nucleolar RNAs, H/ACA box                                                   |
|  | BAG6    | BAG cochaperone 6                                | BAG cochaperones. BAG6 complex.                                                   |
|  | APOM    | Apolipoprotein M                                 | Apolipoproteins. Lipocalins                                                       |
|  | C6orf47 | Chromosome 6 open reading frame 47               |                                                                                   |
|  | GPANK1  | G-patch domain and ankyrin repeats 1             | G-patch domain containing. Ankyrin repeat domain containing                       |
|  | CSNK2B  | Casein Kinase 2 Beta                             |                                                                                   |
|  | LY6G5C  | Lymphocyte antigen 6 family member G5C           | LY6/PLAUR domain containing                                                       |
|  | ABHD16A | abhydrolase domain containing 16A, phospholipase | Abhydrolase containing domain. MicroRNA protein coding host genes.                |

|  |             |                                                                    |                                                      |
|--|-------------|--------------------------------------------------------------------|------------------------------------------------------|
|  | MIR4646     | microRNA 4646                                                      | MicroRNAs                                            |
|  | LY6G6F      | lymphocyte antigen 6 family member G6F                             | V-set domain containing. LY6/PLAUR domain containing |
|  | LY6G6E      | lymphocyte antigen 6 family member G6E (pseudogene)                | LY6/PLAUR domain containing                          |
|  | LY6G6C      | lymphocyte antigen 6 family member G6C                             | LY6/PLAUR domain containing                          |
|  | C6orf25     | megakaryocyte and platelet inhibitory receptor G6b                 |                                                      |
|  | DDAH2       | dimethylarginine dimethylaminohydrolase 2                          |                                                      |
|  | CLIC1       | chloride intracellular channel 1                                   | Chloride intracellular channels                      |
|  | MSH5-SAPCD1 | MSH5-SAPCD1 readthrough (NMD candidate)                            |                                                      |
|  | VWA7        | von Willebrand factor A domain containing 7                        |                                                      |
|  | VAR51       | Valine TRNA Ligase 1                                               | Aminoacyl tRNA synthetases, Class I                  |
|  | LSM2        | LSM2 homolog, U6 small nuclear RNA and mRNA degradation associated | LSm proteins                                         |
|  | HSPA1L      | heat shock protein family A (Hsp70) member 1 like                  | TIM23 complex. Heat shock 70kDa proteins.            |
|  | HSPA1A      | heat shock protein family A (Hsp70) member 1A                      | TIM23 complex. Heat shock 70kDa proteins.            |
|  | HSPA1B      | heat shock protein family A (Hsp70) member 1B                      | TIM23 complex. Heat shock 70kDa proteins.            |

|  |         |                                                     |                                                                                                               |
|--|---------|-----------------------------------------------------|---------------------------------------------------------------------------------------------------------------|
|  | C6orf48 | small nucleolar RNA host gene 32                    | Small nucleolar RNA non-coding host genes                                                                     |
|  | SNORD48 | small nucleolar RNA, C/D box 48                     | Small nucleolar RNAs, C/D box                                                                                 |
|  | SNORD52 | small nucleolar RNA, C/D box 52                     | Small nucleolar RNAs, C/D box                                                                                 |
|  | NEU1    | neuraminidase 1                                     | Neuraminidases                                                                                                |
|  | SLC44A4 | solute carrier family 44 member 4                   | Solute carriers                                                                                               |
|  | EHMT2   | euchromatic histone lysine methyltransferase 2      | SET domain containing. Lysine methyltransferases. Ankyrin repeat domain containing.                           |
|  | ZBTB12  | zinc finger and BTB domain containing 12.           | BTB domain containing. Zinc fingers C2H2-type.                                                                |
|  | CFB     | complement factor B                                 | Sushi domain containing. Complement system activation components                                              |
|  | NELFE   | negative elongation factor complex member E         | RNA binding motif containing. Negative elongation factor complex members. MicroRNA protein coding host genes. |
|  | MIR1236 | microRNA 1236                                       | MicroRNAs                                                                                                     |
|  | SKIV2L  | SKI2 subunit of superkiller complex                 | Ski2 like RNA helicases. SKI complex subunits.                                                                |
|  | DOM3Z   | decapping exoribonuclease                           |                                                                                                               |
|  | STK19   | serine/threonine kinase 19.                         |                                                                                                               |
|  | C4B_2   | complement component 4B (Chido blood group), copy 2 |                                                                                                               |

|                                  |            |                                                            |                                                                                |
|----------------------------------|------------|------------------------------------------------------------|--------------------------------------------------------------------------------|
|                                  | CYP21A2    | Cytochrome P450 family 21 subfamily A member 2             | Cytochrome P450 family 21                                                      |
|                                  | CYP21A1P   | Cytochrome P450 family 21 subfamily A member 1, pseudogene | Cytochrome P450 family 21                                                      |
|                                  | TNXB       | Tenascin XB                                                | Tenascins                                                                      |
| Chromosome 8: 8p23.3p22 deletion | DEFB130    | Defensin beta 130A                                         | Defensins, beta                                                                |
|                                  | ZNF705A    | Zinc finger protein 705A                                   | Zinc fingers C2H2-type                                                         |
|                                  | LOC649352  | eUbiquitin Carboxyl-Terminal Hydrolase 17-Like, pseudogene |                                                                                |
|                                  | DEFB109P1  | Defensin beta 109A (pseudogene)                            | Defensins, beta                                                                |
|                                  | FAM90A25 P | Family with sequence similarity 90 member A25, pseudogene  |                                                                                |
|                                  | FAM86B2    | Family with sequence similarity 86 member B2               |                                                                                |
|                                  | LOC729732  | Uncharacterized LOC729732                                  |                                                                                |
|                                  | LONRF1     | LON peptidase N-terminal domain and ring finger 1          | Ring finger proteins. MicroRNA protein coding host genes.                      |
|                                  | MIR3926-1  | microRNA 3926-1                                            | MicroRNAs.                                                                     |
|                                  | MIR3926-2  | microRNA 3926-2                                            | MicroRNAs.                                                                     |
|                                  | LINC00681  | Long intergenic non-protein coding RNA 681                 | Long intergenic non-protein coding RNAs                                        |
|                                  | KIAA1456   | tRNA methyltransferase 9B (putative)                       | 7BS DNA/RNA methyltransferases                                                 |
|                                  | DLC1       | DLC1 Rho GTPase activating protein                         | StAR related lipid transfer domain containing. Rho GTPase activating proteins. |



|  |          |                                       |                                                                                                   |
|--|----------|---------------------------------------|---------------------------------------------------------------------------------------------------|
|  | BC035181 | uncharacterized<br>LOC101930149       |                                                                                                   |
|  | C8orf48  | chromosome 8 open<br>reading frame 48 |                                                                                                   |
|  | SGCZ     | sarcoglycan zeta                      | MicroRNA protein<br>coding host genes                                                             |
|  | Y_RNA    | Ro60, Y RNA binding<br>protein        |                                                                                                   |
|  | MIR383   | microRNA 383                          | MicroRNAs.                                                                                        |
|  | TUSC3    | Tumor suppressor<br>candidate 3       | Oligosaccharyltransferase<br>complex subunits.<br>Solute carriers.                                |
|  | MSR1     | Macrophage scavenger<br>receptor 1    | Scavenger receptors.<br>Scavenger receptors<br>cystein rich domain<br>containing. CD<br>molecules |

**Supplementary Table S 2.** Potential CRISPR/Cas9 off-target sites identified by Cas-OFFinder for the designed gRNA.

| Bulge Type | Target                                                               | Chromosome | Position  | Direction | Mismatches | Bulge Size |
|------------|----------------------------------------------------------------------|------------|-----------|-----------|------------|------------|
| X          | crRNA: CGCCATGGCGACTGCGACCCCCGNGG<br>DNA: CGCCAaGGCGtCTGgGgCCCCCGCGG | Chr1       | 240093668 | +         | 4          | 0          |
| X          | CrRNA: CGCCATGGCGACTGCGACCCCCGNGG<br>DNA: CGCCcgGGCcACcGCGACCCCCGCGG | Chr21      | 45541983  | +         | 4          | 0          |
| X          | CrRNA: CGCCATGGCGACTGCGACCCCCGNGG<br>DNA: CGCCATGGCaACcGCGgCCtCCGGGG | Chr17      | 4812372   | -         | 4          | 0          |
| X          | crRNA: CGCCATGGCGACTGCGACCCCCGNGG<br>DNA: CGtGGGTCaCAGTCaCCATGGCcAGG | Chr16      | 85729333  | +         | 4          | 0          |

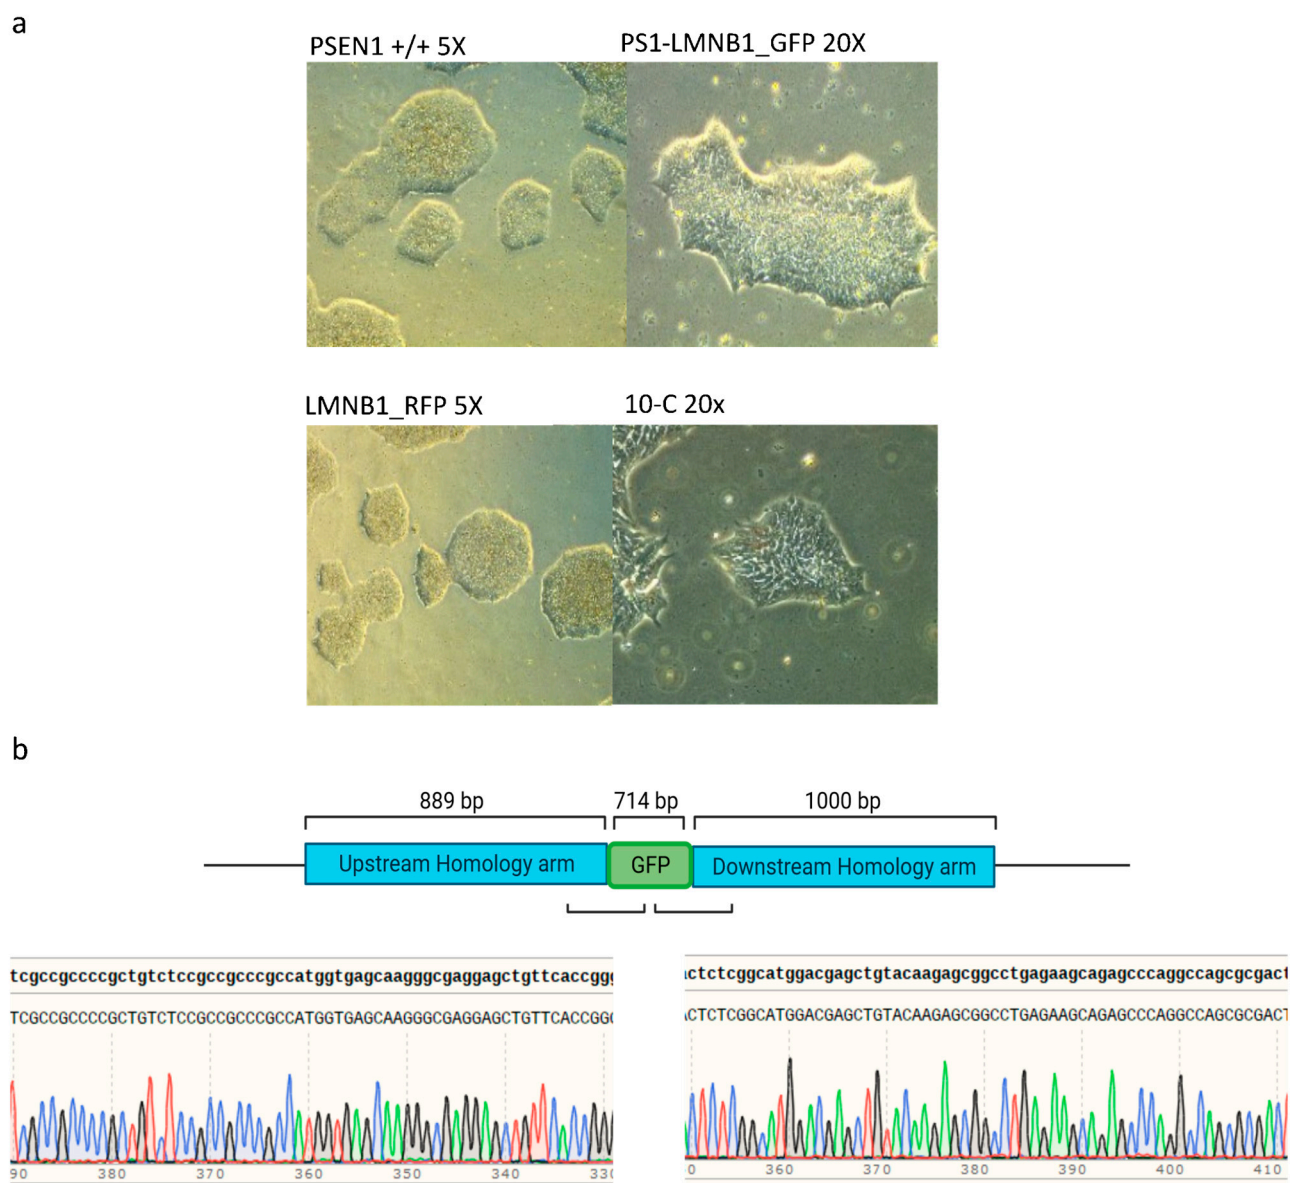

**Supplementary Figure S1. Morphological and genetic assessment of CRISPR/Cas9-mediated *LMNB1* gene editing.** (a) Gene-edited (PS1-LMNB1\_GFP and LMNB1\_RFP) and non-gene edited (10-C and PSEN1 +/+) hiPSCs colonies displayed normal morphology in culture. (b) Sanger sequencing data obtained after analysis of DNA of PS1-LMNB1\_RFP hiPSC showing the correct knock-in of the GFP in frame with the *LMNB1* sequence.

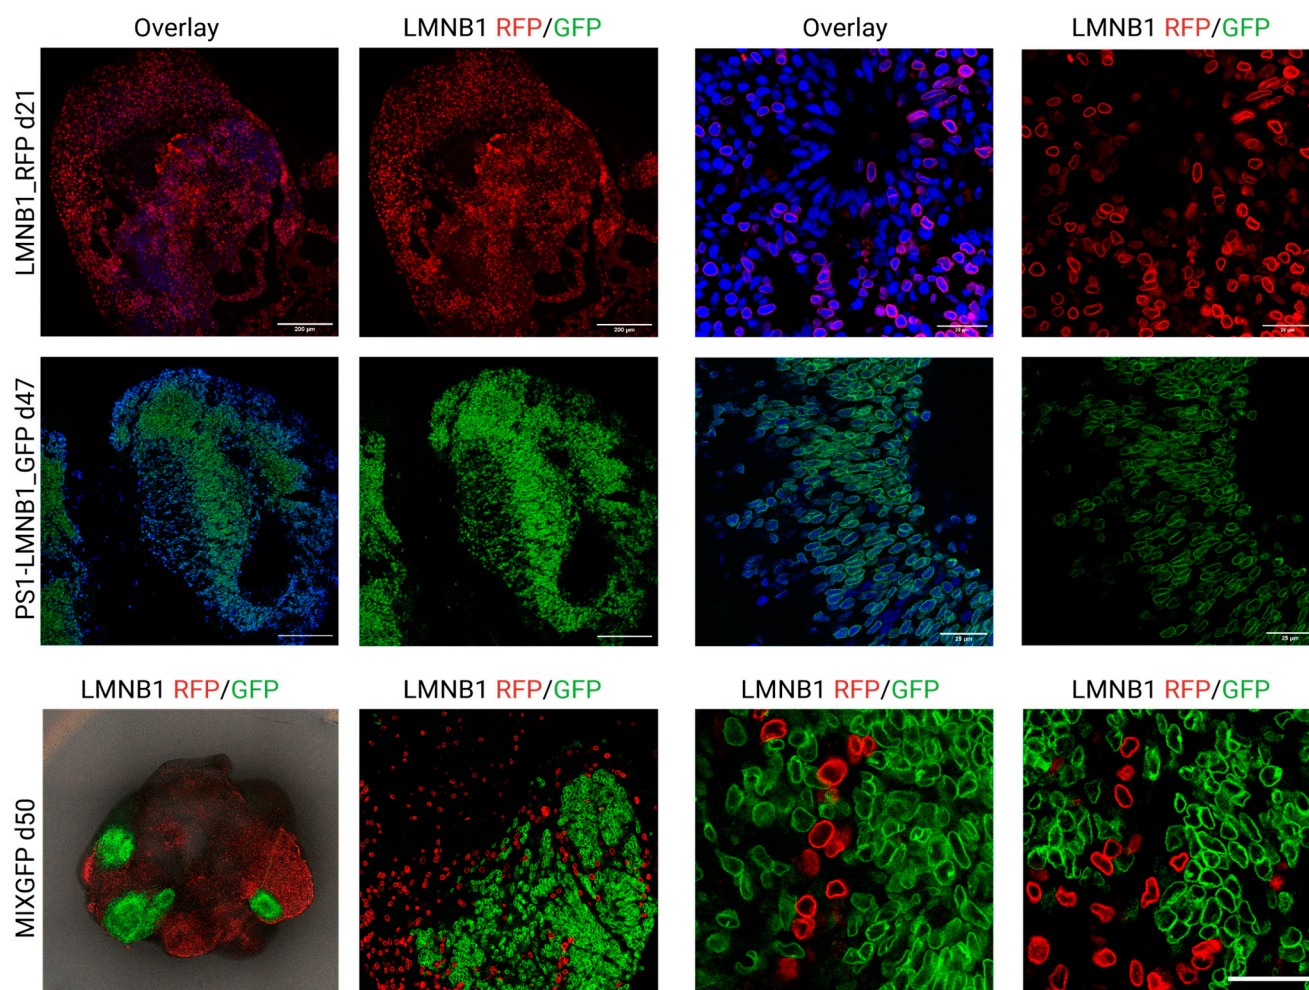

**Supplementary Figure S2. Gene edited cerebral organoids stable LMNB1-tag expression.** Exemplary images of LMNB\_RFP (upper row), PS1-LMNB\_GFP (middle row), and MIX RFP/GFP (bottom row) COs displaying LMNB1-fluorescent stable homogeneous expression. The overlay of the organoid (left) is displayed together with a detailed 100x magnification (right) where the perinuclear phenotype of the tagged lamin-B1 is discernible. Scale bar: 200 μm (overview), 25 μm (magnification).

**Disclaimer/Publisher's Note:** The statements, opinions and data contained in all publications are solely those of the individual author(s) and contributor(s) and not of MDPI and/or the editor(s). MDPI and/or the editor(s) disclaim responsibility for any injury to people or property resulting from any ideas, methods, instructions or products referred to in the content.
